# Supplementary material
Source: MDPI journal article supplement (https://www.mdpi.com/2071-1050/14/1/313)
Supplement: s1 [file s1]

## **Online supplement to:**

---

**Spatio-temporal modeling of small-scale ultrafine particles variability using Generalized Additive Models**

Alessandra Gaeta, Gianluca Leone, Alessandro Di Menno di Bucchianico, Mariacarmela Cusano, Raffaella Gaddi, Armando Pelliccioni, Maria Antonietta Reatini, Annalisa Di Bernardino and Giorgio Cattani

a)

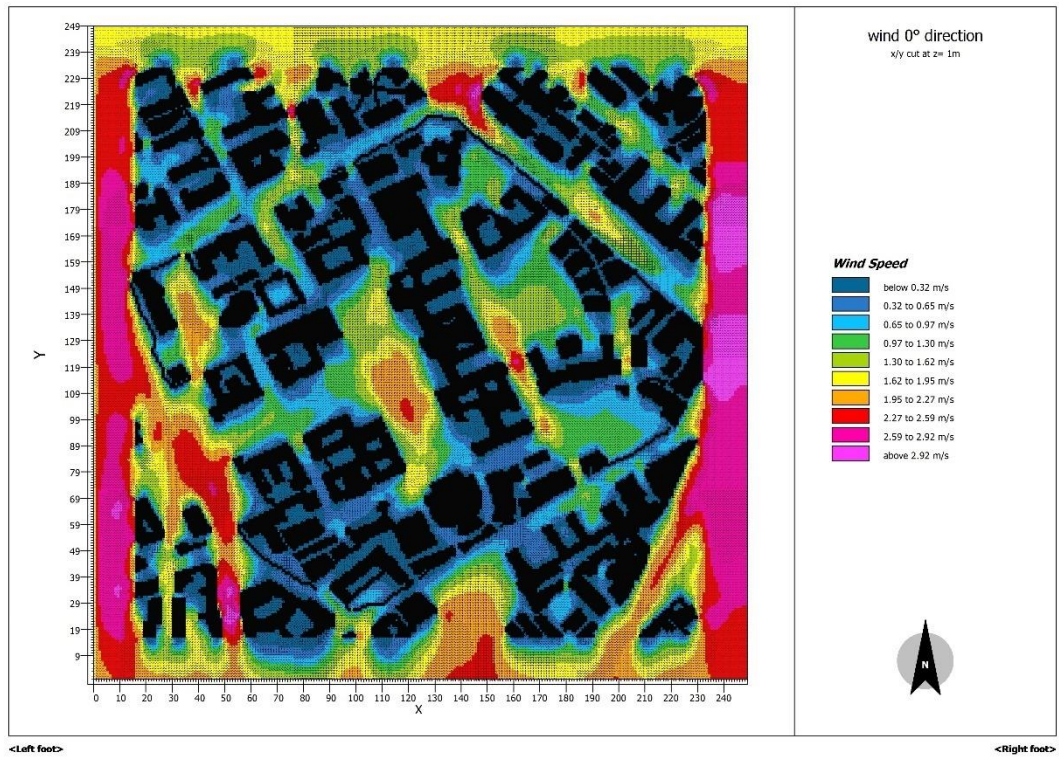

b)

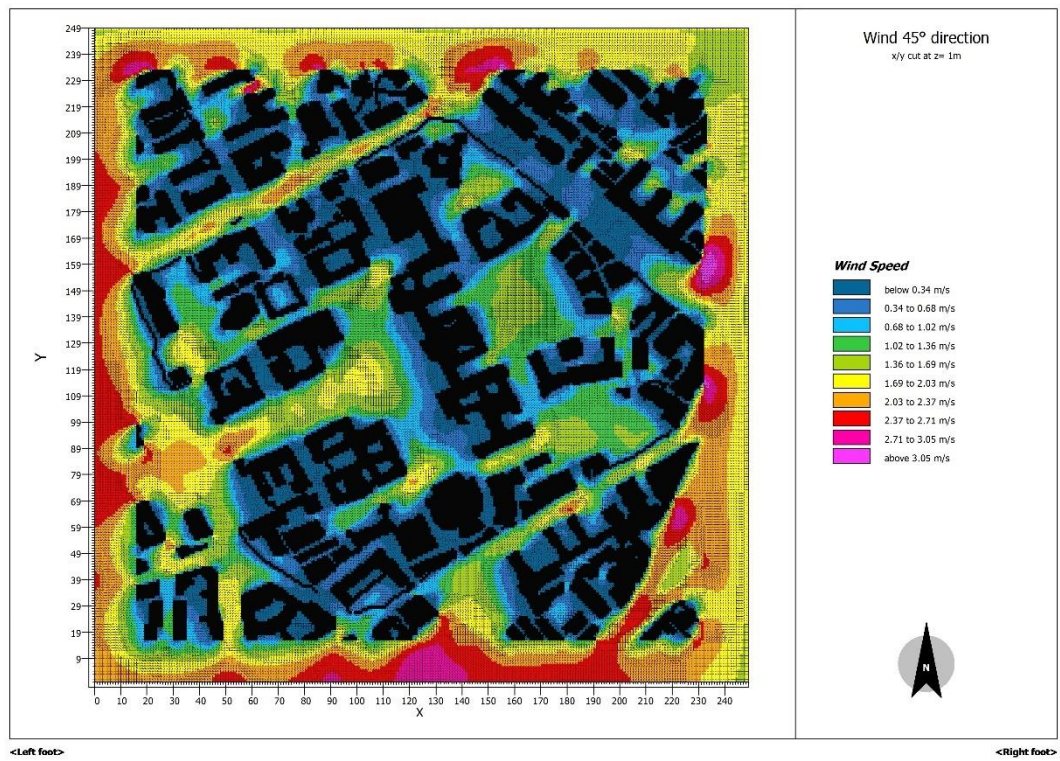



c)

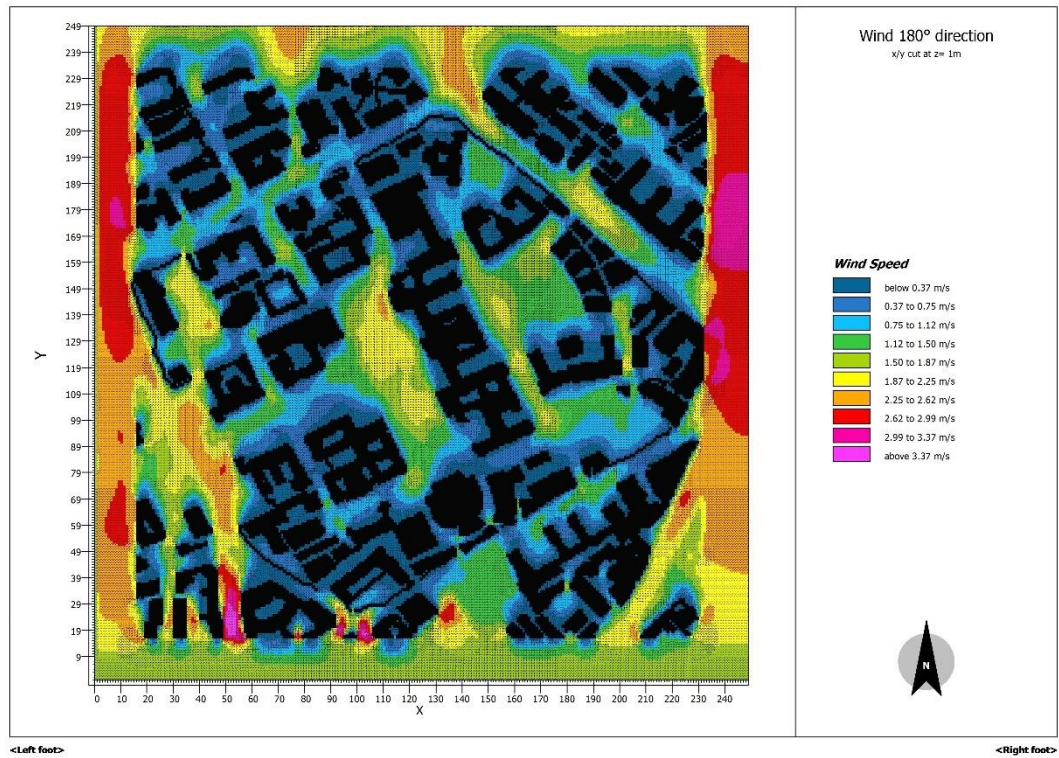

d)

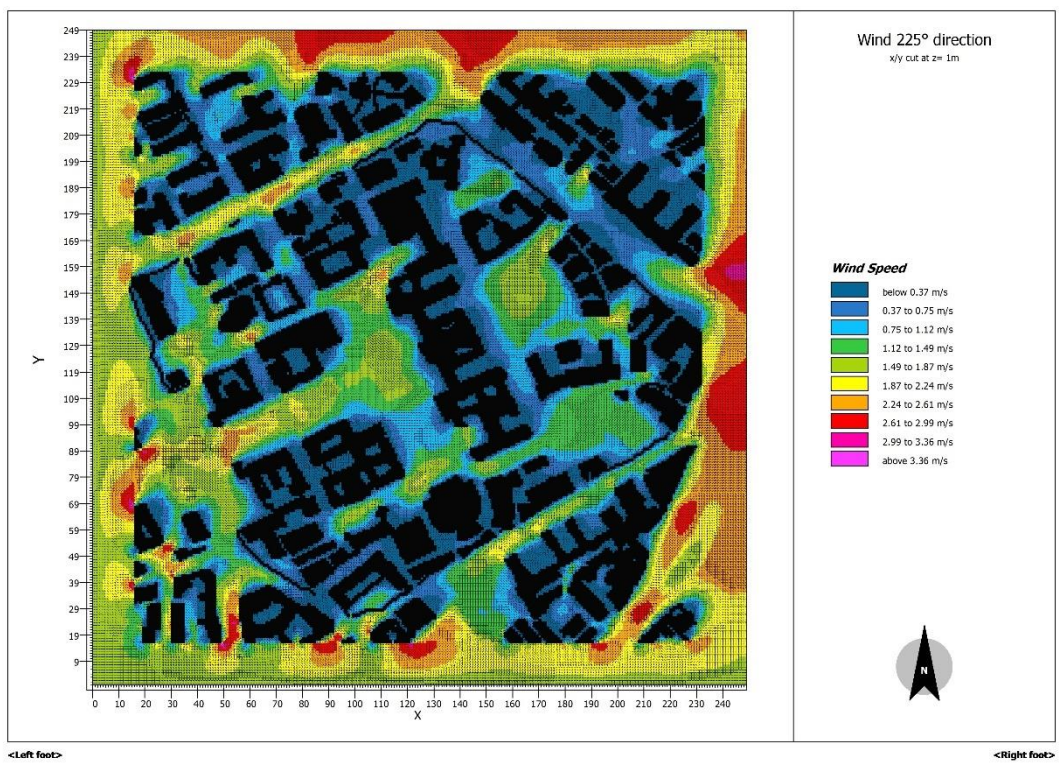

**Figure S1.** Horizontal wind intensity fields obtained by ENVIMET numerical simulations with different wind directions: a) 0°, b) 45°, c) 180°, d) 225°.



**A5:** Minerva monumental fountain   **A4:** Statistical sciences building (in front of)   **A3:** Info point "Ciao" (crossroad)

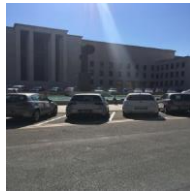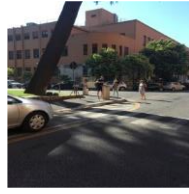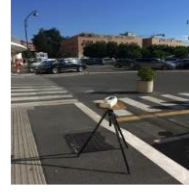

**A6:** Divina Sapienza chapel

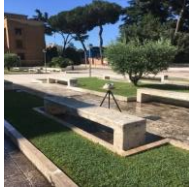

**A7:** Orthopedic clinic

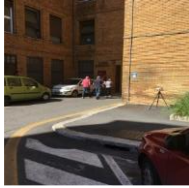

**A2:** Sapienza botanical garden

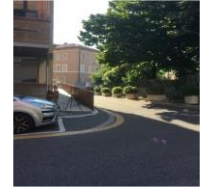

**A1:** Physics Fermi building

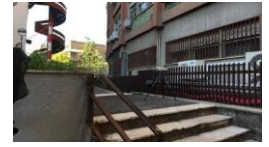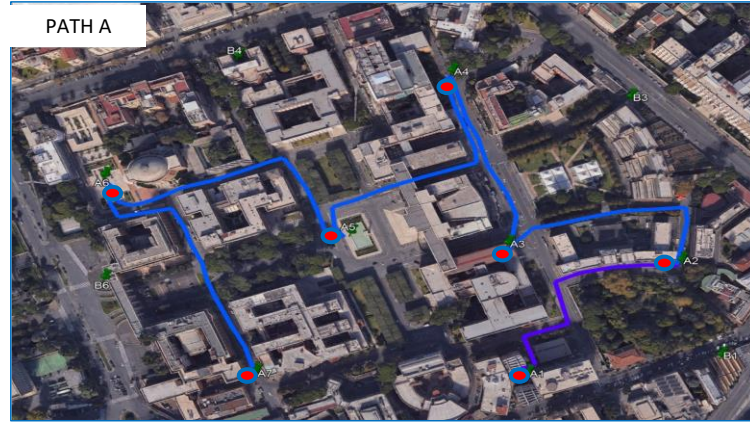

**Figure S2a.** Measurement points selected in Path A: within Sapienza borders.

**B5:** v.le Policlinico n. 159

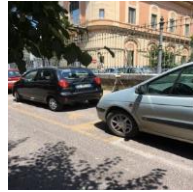

**B4:** v.le dell'Università n. 32

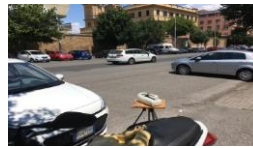

**B3:** v.le Regina Elena n. 334

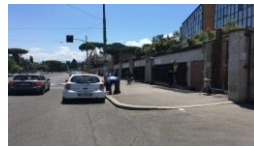

**B6:** p.le Aldo Moro n. 5

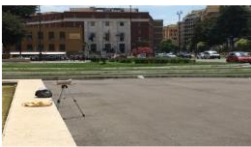

**B7:** p.zza dei Siculi n. 2

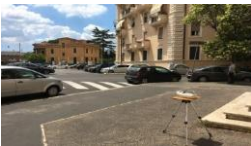

**B2:** via Tiburtina snc

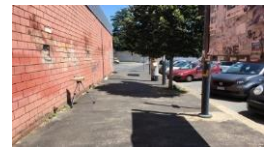

**B1:** via C. De Lollis n. 25

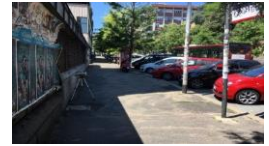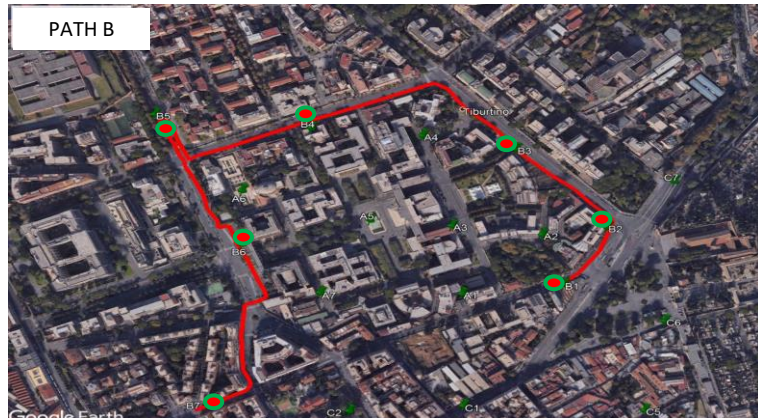

**Figure S2b.** Measurement points selected in Path B: main roads outside Sapienza borders.



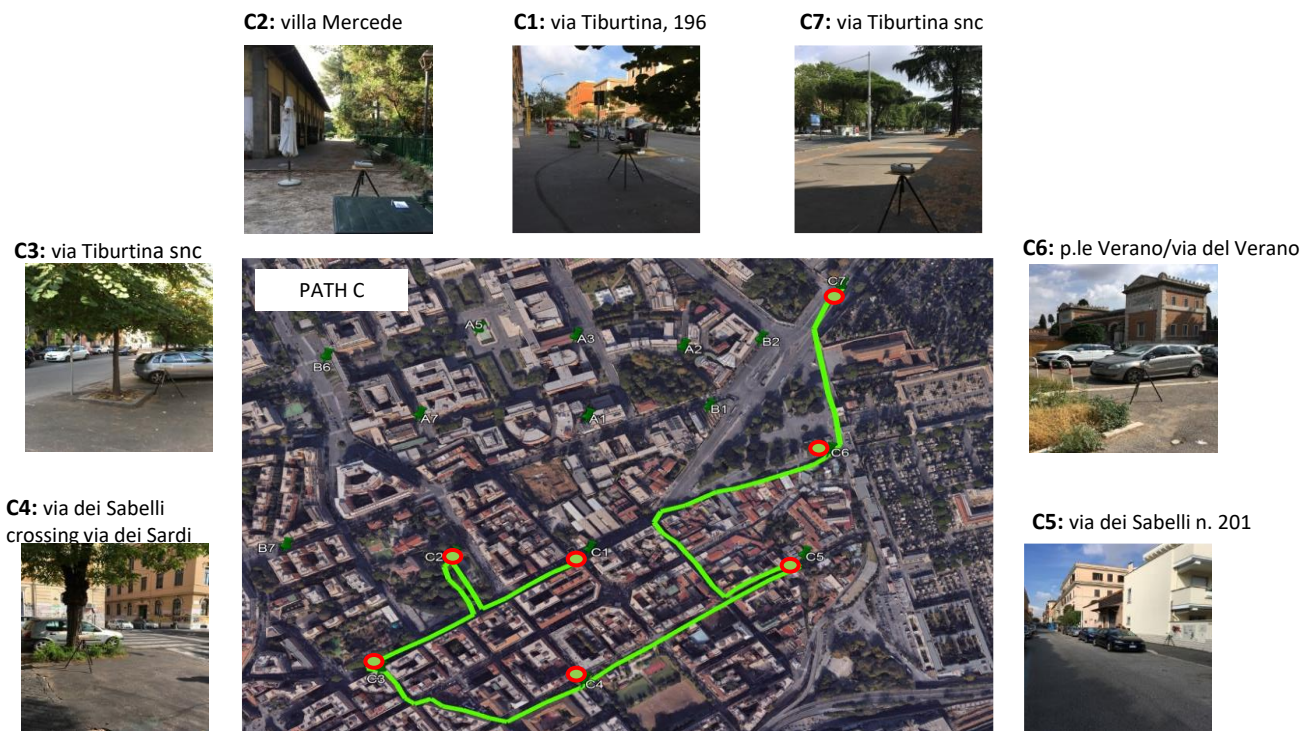

**Figure S2c.** Measurement points selected in Path C: urban area 3B - San Lorenzo.

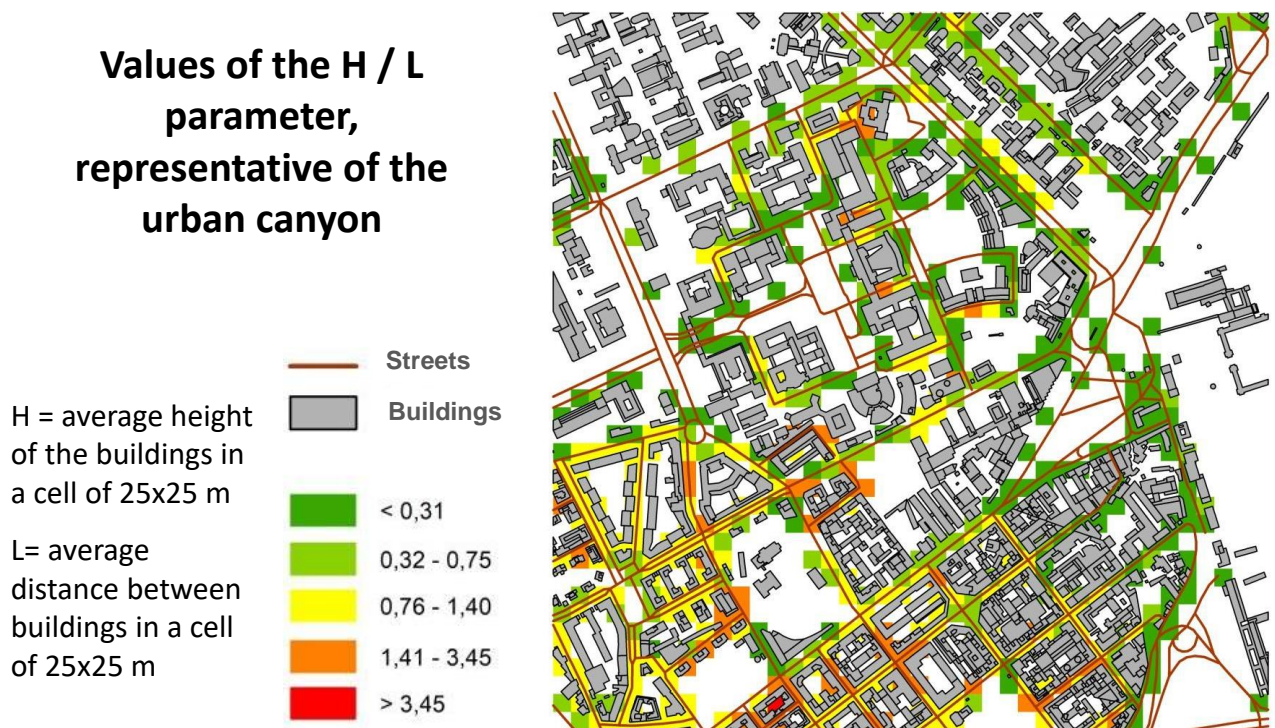

**Figure S3.** H/L parameter values, representative of the urban canyon.

**Table S1.** First campaign, 8 - 17 November 2017. Summary statistics for two-hour PNC (particles/cm<sup>3</sup>) measurements at 21 sites in the study area.

| Site | Mean  | sd    | CV (%) | Min   | perc 25° | Median | perc 75° | Max    | n  |
|------|-------|-------|--------|-------|----------|--------|----------|--------|----|
| A1   | 18666 | 6232  | 33%    | 8583  | 14936    | 16513  | 22792    | 31013  | 21 |
| A2   | 18551 | 7845  | 42%    | 8042  | 11914    | 17657  | 23034    | 39896  | 21 |
| A3   | 18576 | 6368  | 34%    | 8839  | 14504    | 16965  | 22887    | 30821  | 21 |
| A4   | 19458 | 7459  | 38%    | 7804  | 15616    | 18379  | 22410    | 36053  | 21 |
| A5   | 20367 | 7993  | 39%    | 7190  | 16078    | 19865  | 22525    | 40048  | 21 |
| A6   | 18142 | 6755  | 37%    | 7718  | 15346    | 16440  | 20454    | 39018  | 21 |
| A7   | 19163 | 6292  | 33%    | 7783  | 14722    | 19054  | 22322    | 31089  | 21 |
| B1   | 38842 | 20264 | 52%    | 16806 | 25456    | 34467  | 46097    | 89288  | 21 |
| B2   | 35922 | 22748 | 63%    | 5722  | 20238    | 29977  | 44142    | 100107 | 21 |
| B3   | 25225 | 11808 | 47%    | 8331  | 19203    | 24089  | 30050    | 61017  | 21 |
| B4   | 28582 | 13915 | 49%    | 8645  | 17091    | 24138  | 35730    | 62497  | 21 |
| B5   | 28155 | 10455 | 37%    | 9228  | 22481    | 29688  | 34250    | 49235  | 21 |
| B6   | 18585 | 6896  | 37%    | 8070  | 14954    | 17945  | 20816    | 40148  | 21 |
| B7   | 24045 | 10190 | 42%    | 10496 | 17300    | 22337  | 26364    | 58242  | 21 |
| C1   | 29530 | 11785 | 40%    | 17541 | 22355    | 24902  | 27842    | 62524  | 21 |
| C2   | 18449 | 6386  | 35%    | 4416  | 15109    | 16860  | 23041    | 30860  | 21 |
| C3   | 28117 | 9579  | 34%    | 15349 | 20993    | 25514  | 32712    | 51323  | 21 |
| C4   | 23931 | 7307  | 31%    | 11800 | 18725    | 22797  | 26847    | 38867  | 21 |
| C5   | 27197 | 19343 | 71%    | 7236  | 18618    | 22762  | 29985    | 101594 | 21 |
| C6   | 18569 | 7102  | 38%    | 7388  | 14803    | 17511  | 21531    | 39542  | 21 |
| C7   | 29501 | 11358 | 39%    | 11015 | 20955    | 27945  | 34162    | 48359  | 21 |

**Table S2.** Second campaign, 17 – 23 June 2018. Summary statistics for two-hour PNC (particles/cm<sup>3</sup>) measurements at 21 sites in the study area.

| Site | Mean  | sd   | CV (%) | Min  | perc 25° | Median | perc 75° | Max   | n  |
|------|-------|------|--------|------|----------|--------|----------|-------|----|
| A1   | 9291  | 3212 | 35%    | 4850 | 7244     | 8770   | 11364    | 19135 | 21 |
| A2   | 8717  | 2551 | 29%    | 4899 | 6468     | 9349   | 9916     | 14395 | 21 |
| A3   | 8494  | 2766 | 33%    | 4807 | 6428     | 8312   | 10021    | 14613 | 21 |
| A4   | 8471  | 2255 | 27%    | 4893 | 6471     | 8568   | 10165    | 13271 | 21 |
| A5   | 8115  | 2641 | 33%    | 4335 | 5581     | 8057   | 9586     | 13665 | 21 |
| A6   | 8107  | 2537 | 31%    | 5262 | 6117     | 7619   | 9870     | 14108 | 21 |
| A7   | 8020  | 2787 | 35%    | 4306 | 5819     | 8141   | 9480     | 14970 | 21 |
| B1   | 17138 | 7575 | 44%    | 8004 | 9757     | 14615  | 23716    | 28962 | 21 |
| B2   | 15970 | 5915 | 37%    | 7982 | 11041    | 15467  | 19075    | 32483 | 21 |
| B3   | 12274 | 4631 | 38%    | 5238 | 7792     | 12477  | 14470    | 22740 | 21 |
| B4   | 14910 | 6580 | 44%    | 6542 | 9512     | 12443  | 19713    | 31291 | 21 |
| B5   | 13817 | 6290 | 46%    | 6347 | 7800     | 12683  | 17701    | 26373 | 21 |
| B6   | 9389  | 3387 | 36%    | 5943 | 6559     | 7969   | 11812    | 16339 | 21 |
| B7   | 10730 | 3416 | 32%    | 5684 | 8270     | 10983  | 12449    | 19401 | 21 |
| C1   | 14091 | 5985 | 42%    | 6433 | 9993     | 12589  | 17182    | 27262 | 21 |
| C2   | 9108  | 3141 | 34%    | 4477 | 6501     | 8848   | 10632    | 16787 | 21 |
| C3   | 15467 | 7085 | 46%    | 7312 | 9664     | 13160  | 21857    | 31444 | 21 |
| C4   | 11774 | 4471 | 38%    | 5532 | 8271     | 11216  | 13440    | 23156 | 21 |
| C5   | 9943  | 4478 | 45%    | 3565 | 6062     | 10850  | 11589    | 21874 | 21 |
| C6   | 8140  | 3184 | 39%    | 3846 | 5105     | 7039   | 10152    | 15011 | 21 |
| C7   | 12681 | 5054 | 40%    | 6497 | 8583     | 11938  | 14650    | 24153 | 21 |

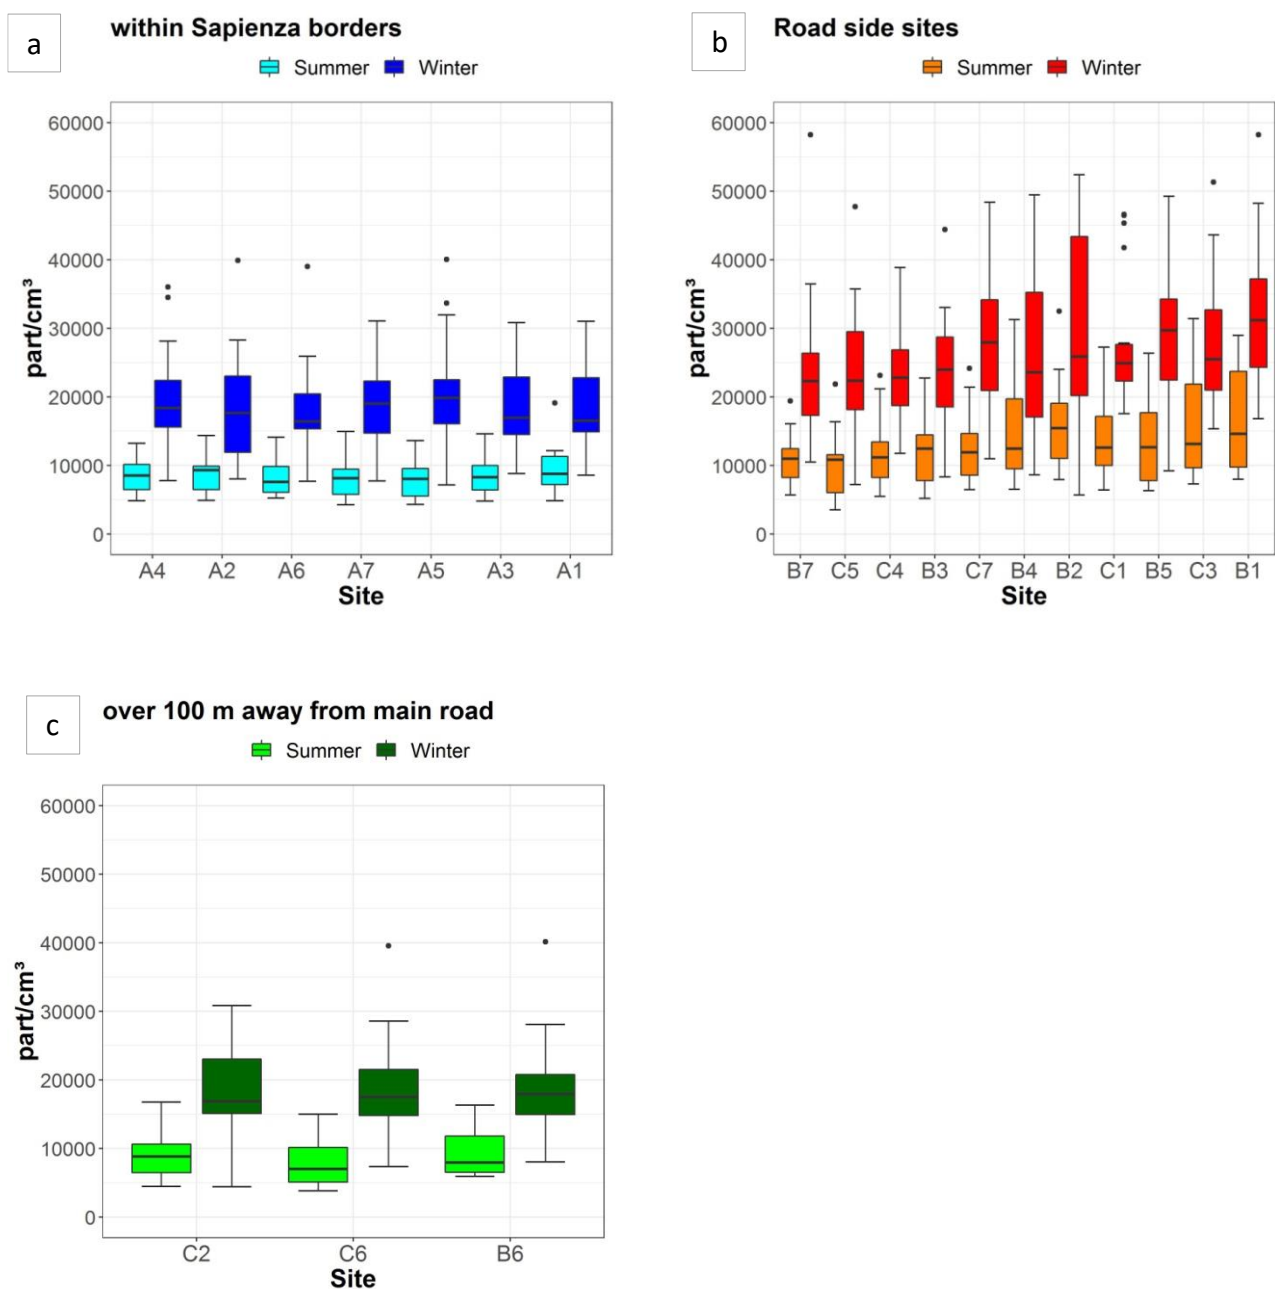

**Figure S4.** Comparison between average PNC values, observed in winter and in summer: a) within Sapienza borders, path A; b) in the points most affected by the greater proximity to roads with high traffic flows, (points B1, B2, B3, B4, B5 and points C1, C3, C7); c) in points relatively far from the busiest roads (B6, C2, C6).

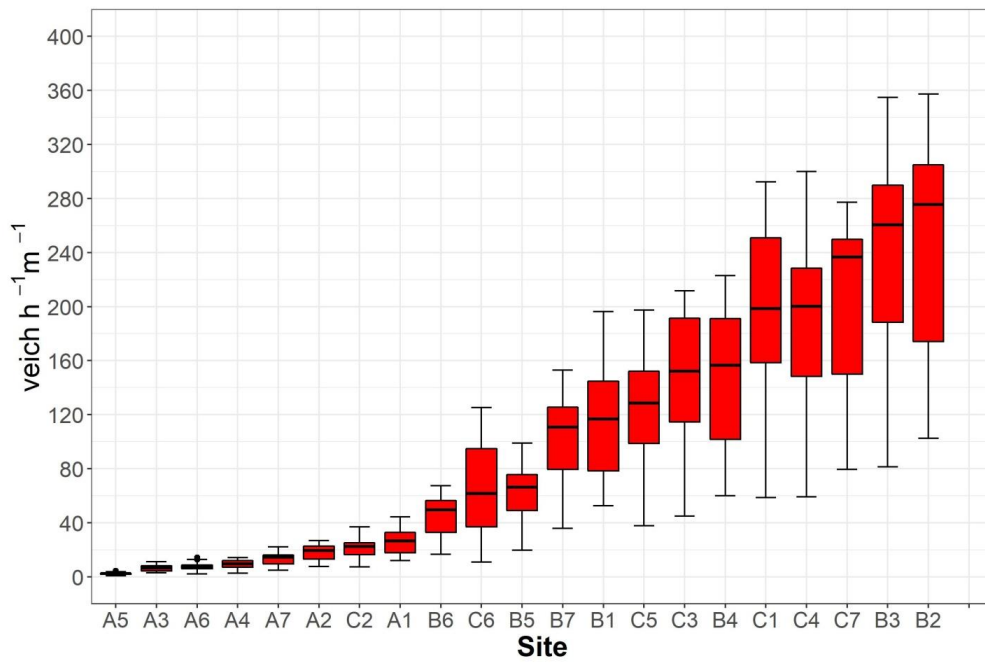

**Figure S5.** Site characterization: ratio between traffic flows on the nearest road and distance from the road.

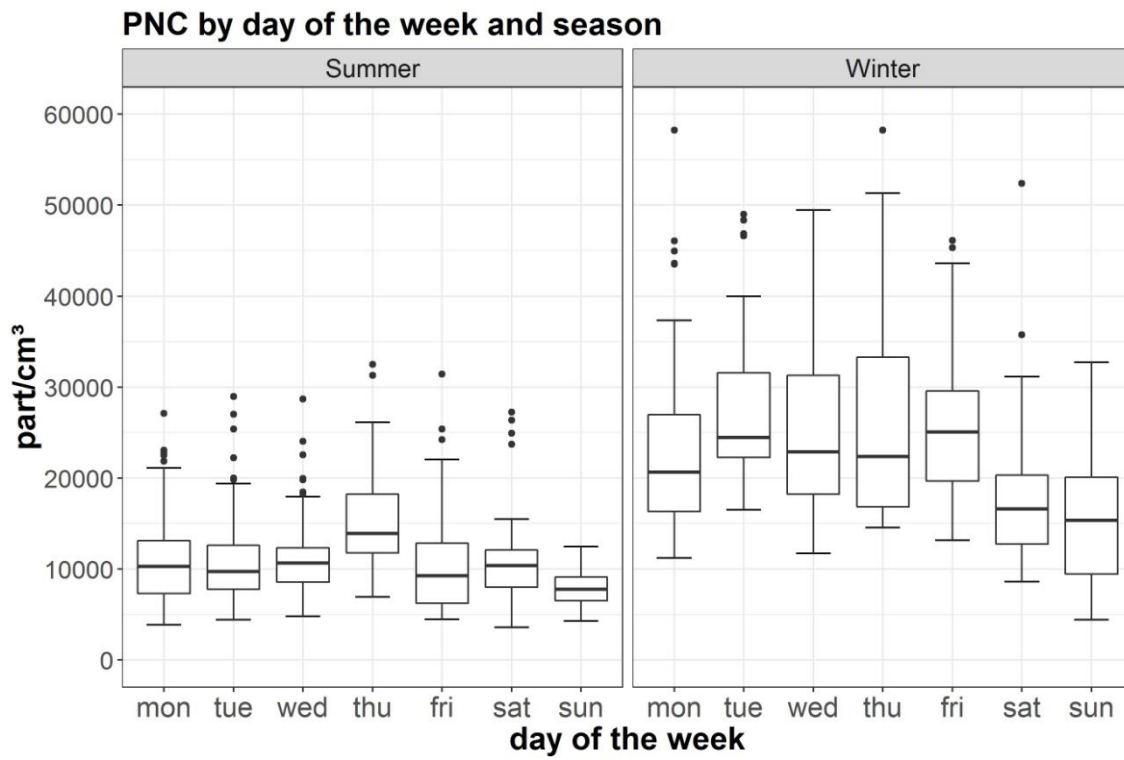

**Figure S6.** Distribution of average PNC values by day of the week and by season.



**Table S3.** Explanatory and response variables

| Variable type             | Variable name           | Explicative notes                                                                                                                                                    |
|---------------------------|-------------------------|----------------------------------------------------------------------------------------------------------------------------------------------------------------------|
| Response variable         | PNC                     | Particle Number Concentrations                                                                                                                                       |
| Temporal variables        | Tdry                    | Temperature (°C)                                                                                                                                                     |
|                           | Urel                    | Relative humidity (%)                                                                                                                                                |
|                           | Pa                      | Atmospheric pressure (mbar)                                                                                                                                          |
|                           | Rg                      | Global solar radiation (W/m <sup>2</sup> )                                                                                                                           |
|                           | Vscal                   | Scalar wind speed (m/s)                                                                                                                                              |
|                           | Dir                     | Wind direction (degrees)                                                                                                                                             |
|                           | Svel                    | Standard deviation of the horizontal wind speed module (m/s)                                                                                                         |
|                           | TKE_Max                 | Maximum turbulent kinetic energy (m <sup>2</sup> /s <sup>2</sup> )                                                                                                   |
|                           | TKE_Min                 | Minimum turbulent kinetic energy (m <sup>2</sup> /s <sup>2</sup> )                                                                                                   |
|                           | RATIO_TKE               | Ratio between maximum and minimum turbulent kinetic energy                                                                                                           |
|                           | DELTA_TKE               | Difference between maximum and minimum turbulent kinetic energy (m <sup>2</sup> /s <sup>2</sup> )                                                                    |
|                           | Hmix <sub>min</sub>     | Minimum planetary boundary layer (PBL) height (m)                                                                                                                    |
|                           | Hmix <sub>average</sub> | Average PBL height (m)                                                                                                                                               |
|                           | Hmix <sub>max</sub>     | Maximum PBL height (m)                                                                                                                                               |
| Spatial variables         | Distinv2                | Inverse of the distance squared from the nearest main/busy road                                                                                                      |
|                           | V_build12               | Average volumes of buildings in a buffer with a radius of 12.5 m (m <sup>3</sup> )                                                                                   |
|                           | V_build25               | Average volumes of buildings in a buffer with a radius of 25 m (m <sup>3</sup> )                                                                                     |
|                           | Canyon12                | Ratio between H_build12 (average height of buildings in a buffer with a radius of 12.5 m) and L_build12 (distance among buildings in a buffer with a radius of 12 m) |
|                           | Canyon25                | Ratio between H_build25 (average height of buildings in a buffer with a radius of 25 m) and L_build25 (distance among buildings in a buffer with a radius of 25 m)   |
|                           | Imperv12                | Impervious surfaces in a buffer with a radius of 12.5 m (m <sup>2</sup> )                                                                                            |
|                           | Imperv25                | Impervious surfaces in a buffer with a radius of 25 m (m <sup>2</sup> )                                                                                              |
|                           | Comm_area12             | Commercial, industrial and public areas in a buffer with a radius of 12.5 m (m <sup>2</sup> )                                                                        |
|                           | Comm_area25             | Commercial, industrial and public areas in a buffer with a radius of 12.5 m (m <sup>2</sup> )                                                                        |
| Spatio-temporal variables | Traff                   | Total traffic flows in directions AB + BA averaged over 2 hours (vehicles/h)                                                                                         |

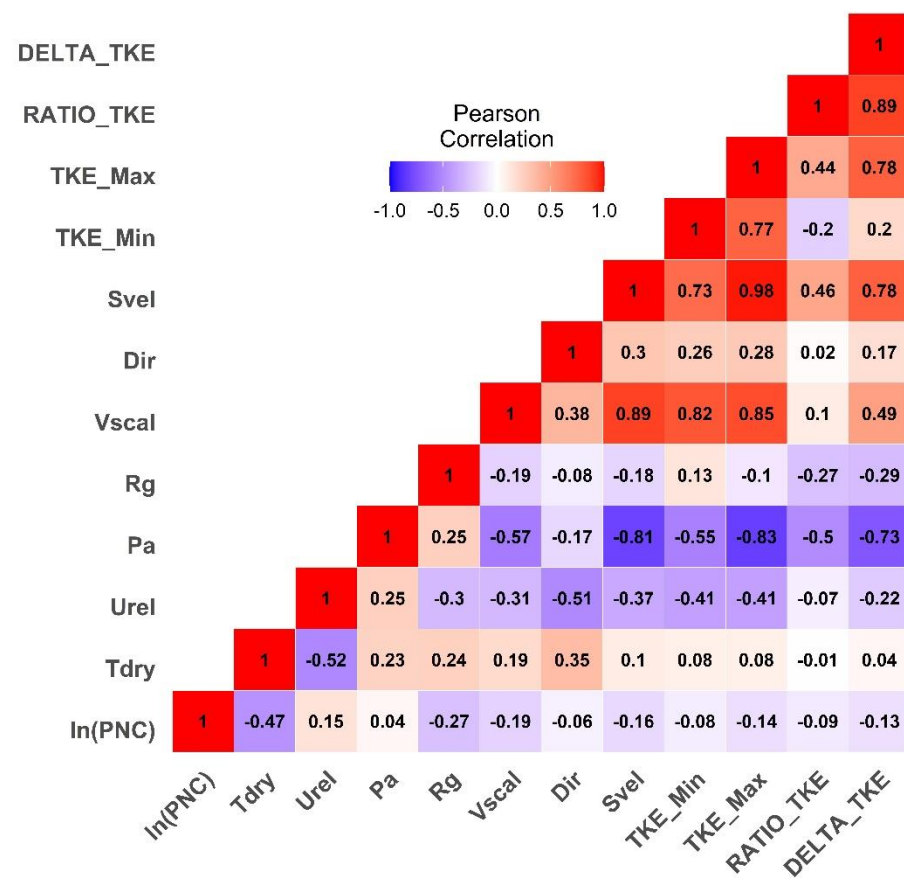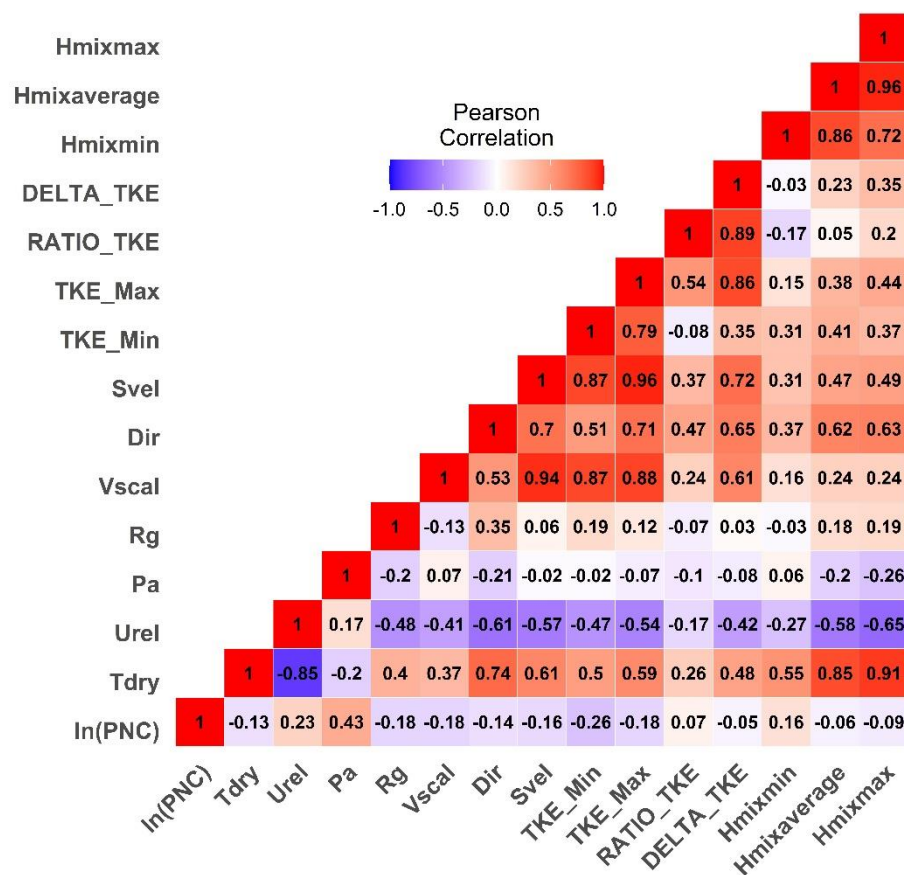

**Figure S7.** Correlation matrix between the natural logarithm of PNC ( $\ln(\text{PNC})$ ) and the main meteorological and micrometeorological variables, in the two seasons, winter (left), summer (right).

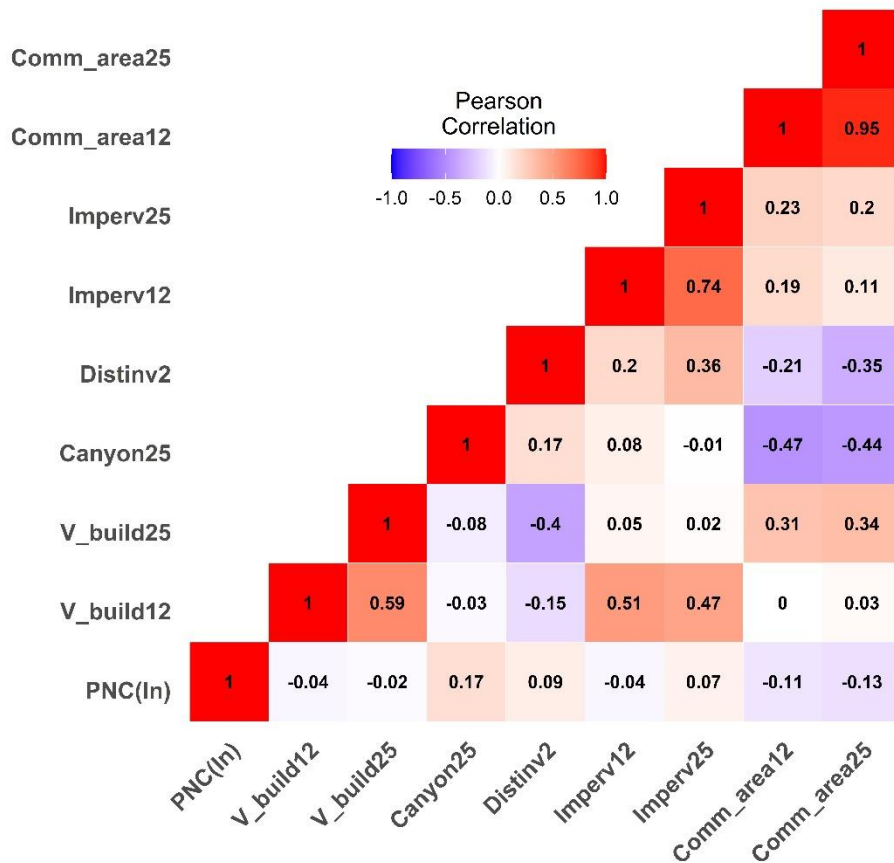

**Figure S8.** Correlation matrix between the natural logarithm of PNC ( $\ln(\text{PNC})$ ) and the main spatial variables.

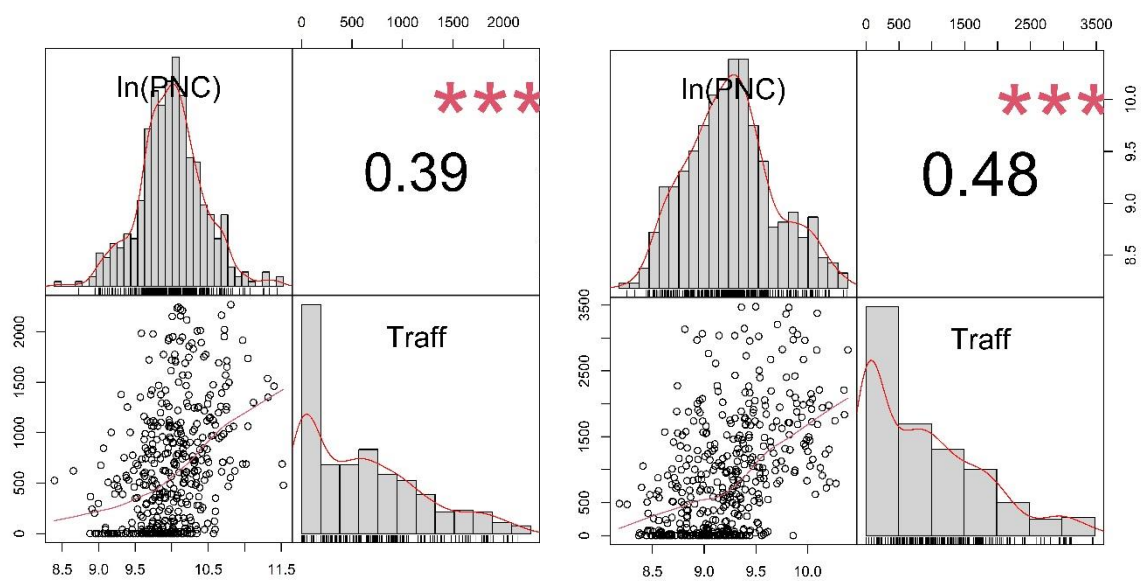

**Figure S9.** Correlation matrix between the natural logarithm of PNC ( $\ln(\text{PNC})$ ) and the traffic flows, in winter (left) and in summer (right).



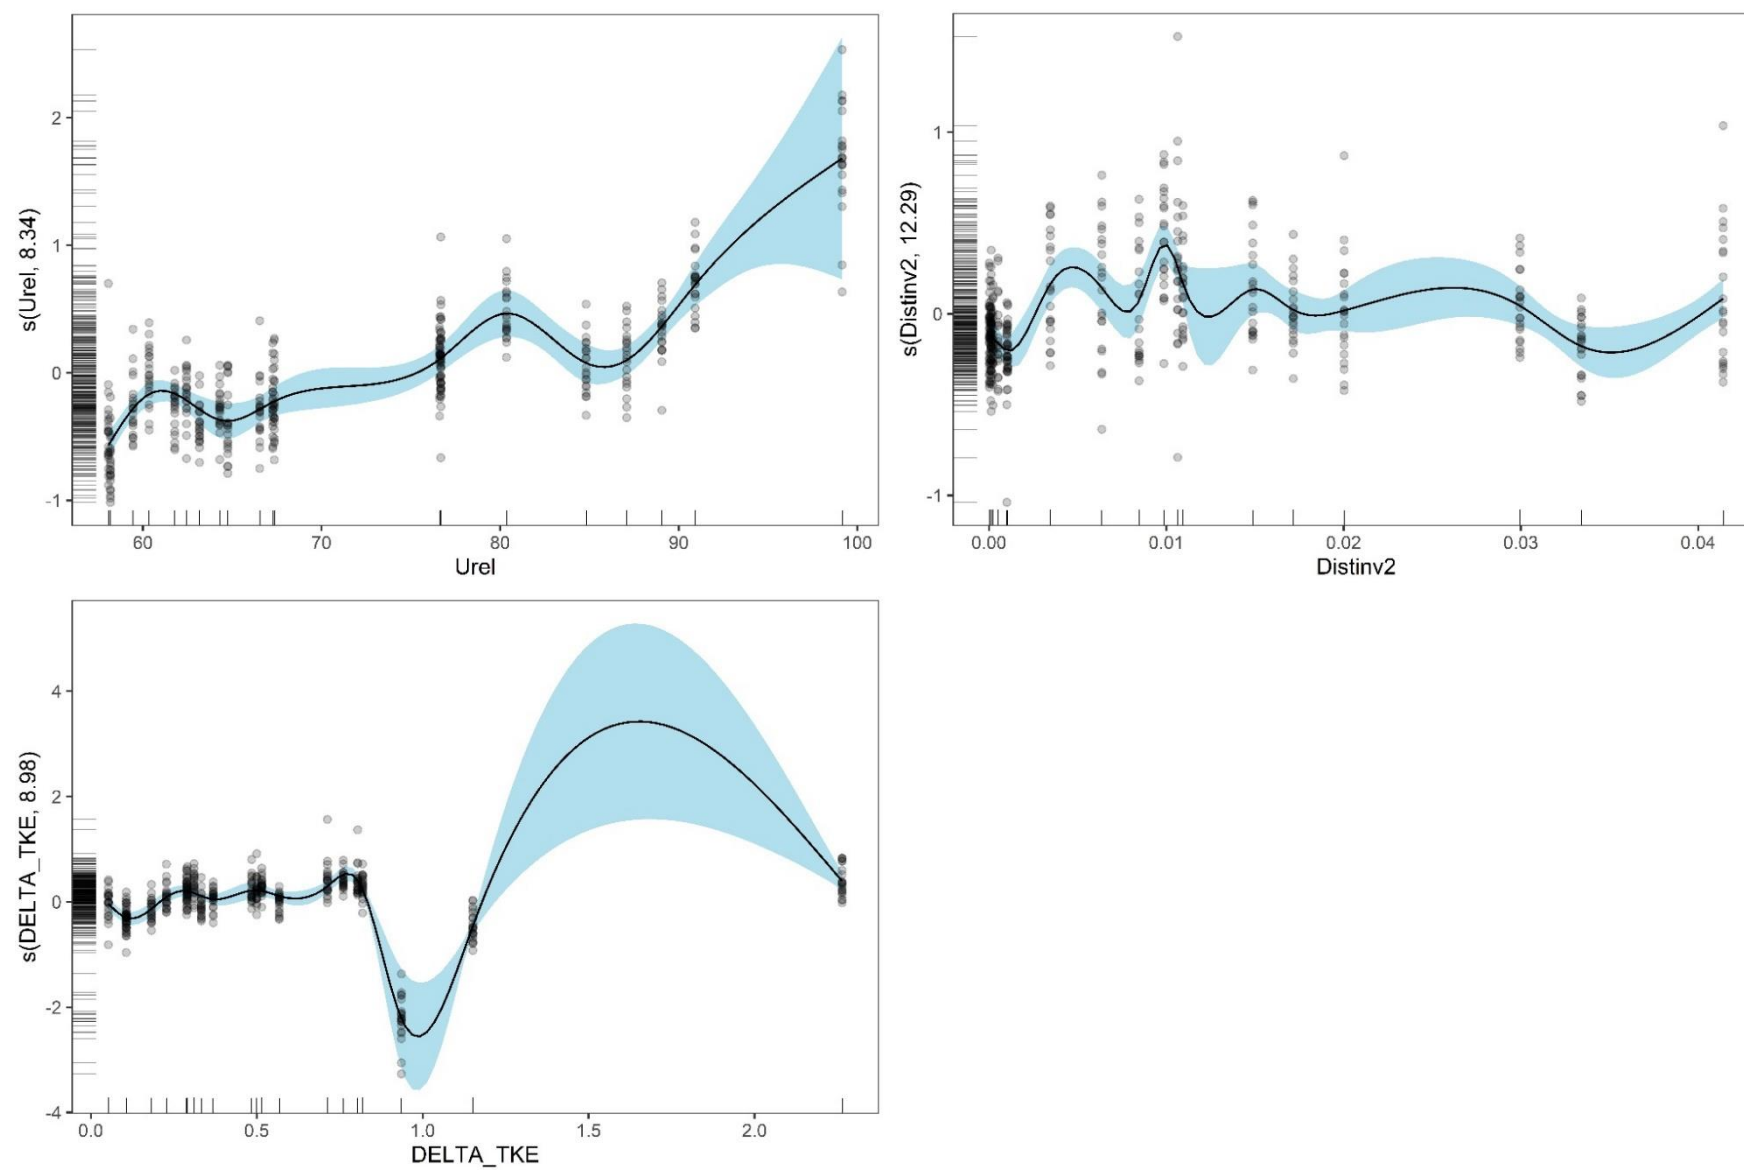

**Figure S10.** November 2017 model: trends of the spline functions for  $Urel$ ,  $Distinv2$  and  $DELTA\_TKE$  variables.

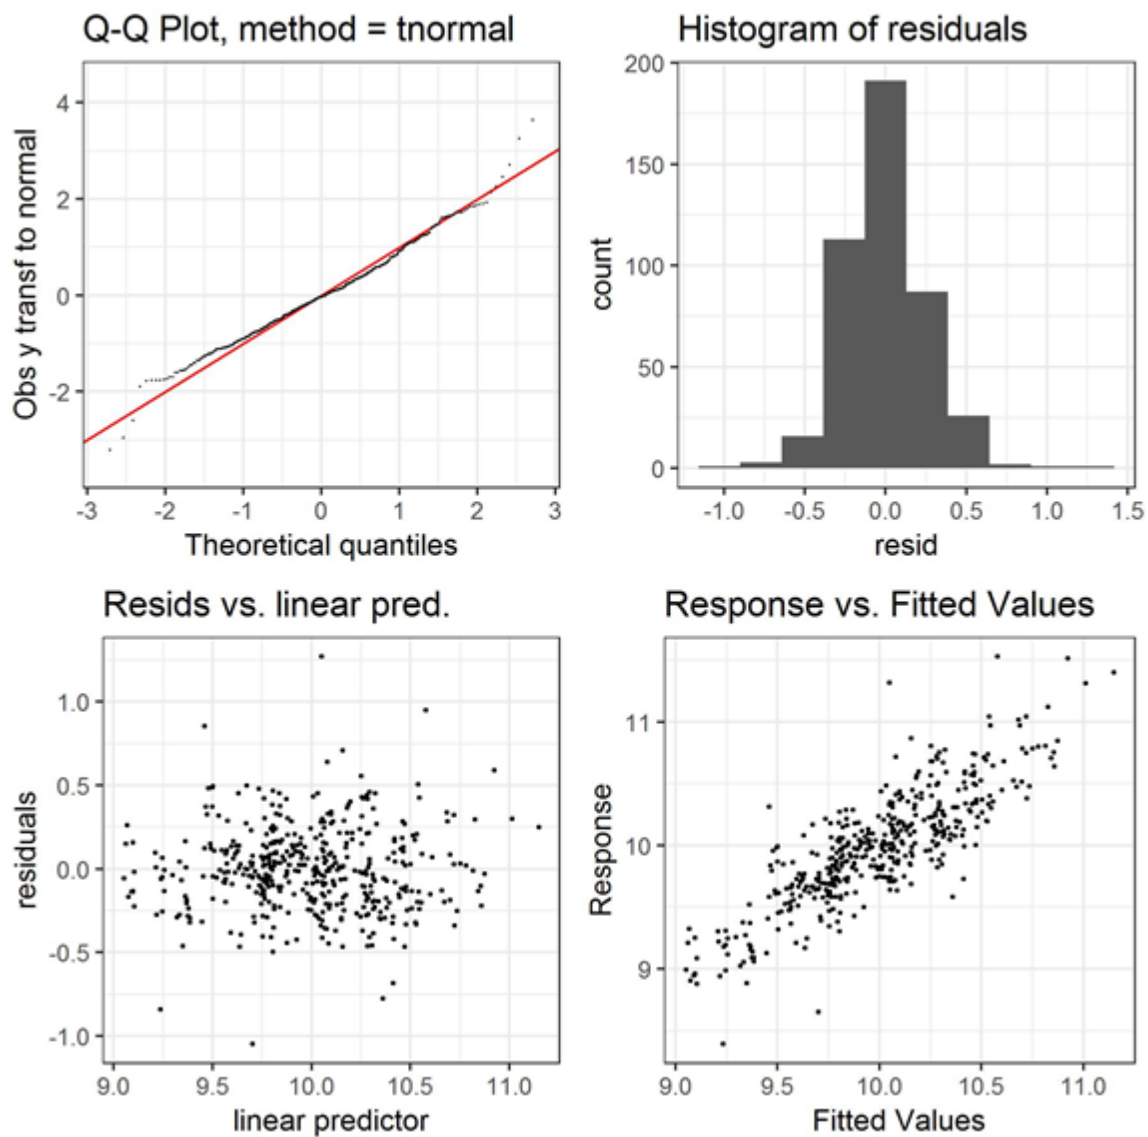

**Figure S11.** Checks of the basic assumptions of the *November 2017 model*: residual analysis.

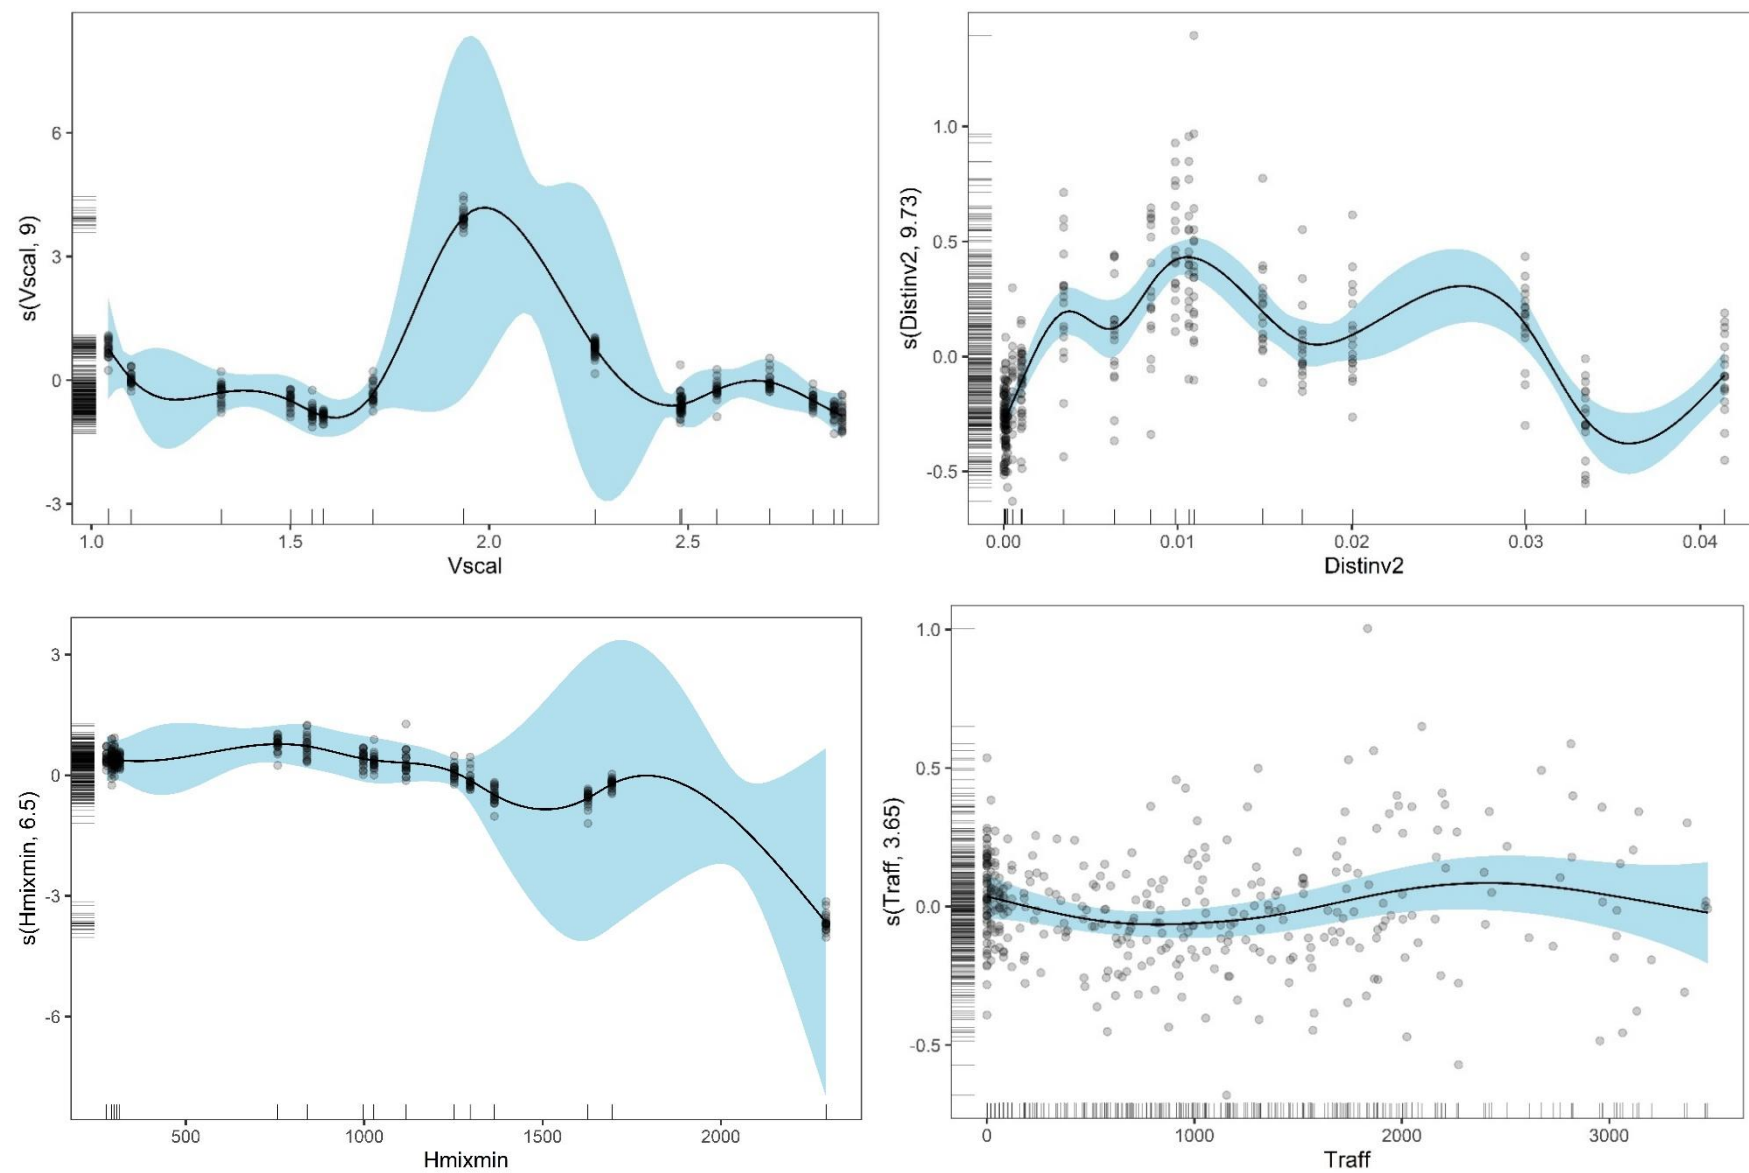

**Figure S12.** June 2018 model: trends of the splines for  $Vscal$ ,  $Distinv2$ ,  $Hmixmin$  and  $Traff$  variables.



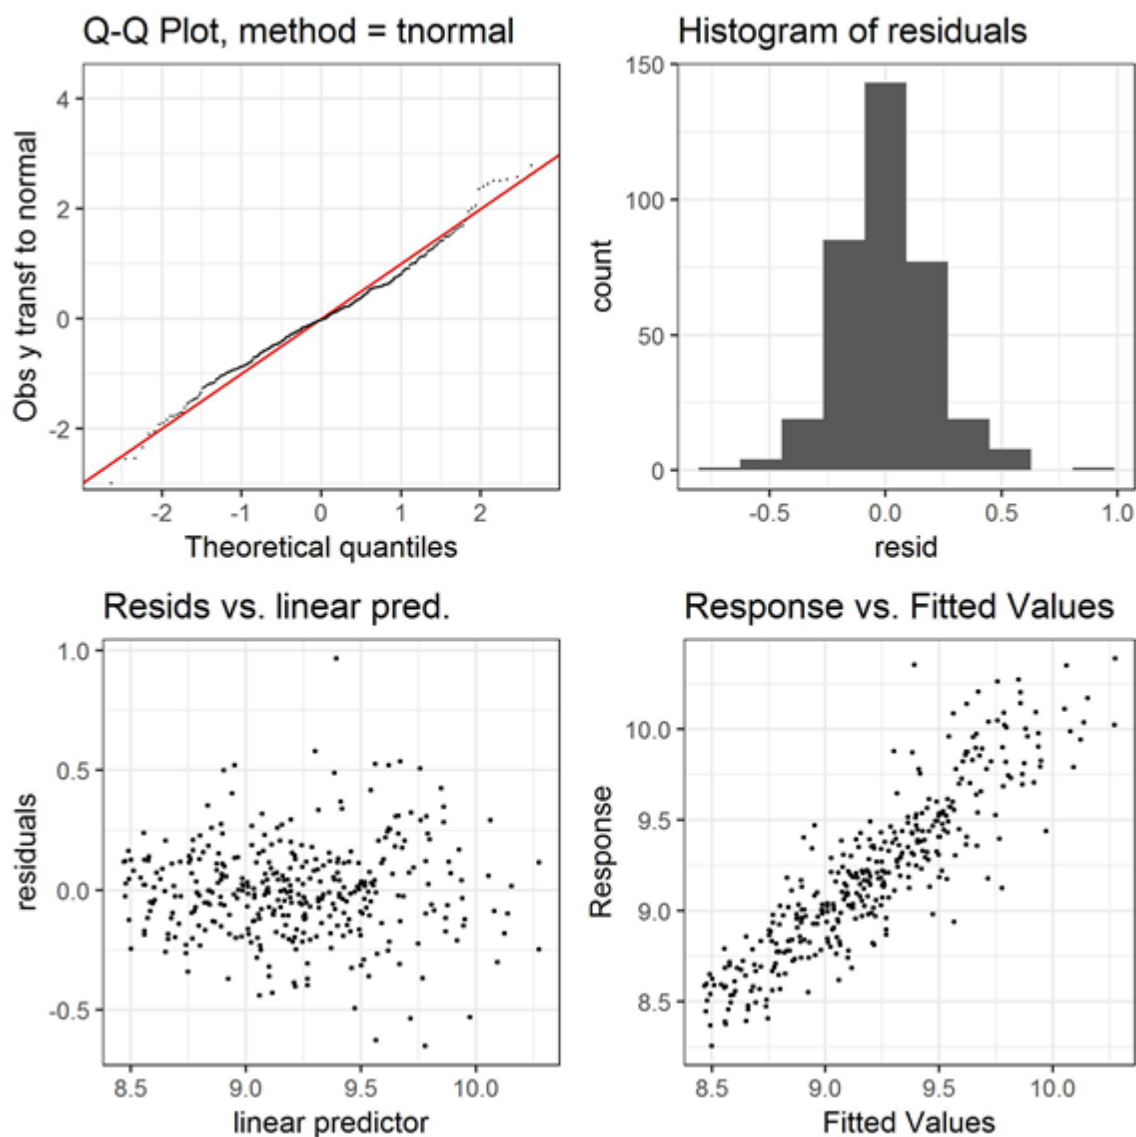

**Figure S13.** Checks of the basic assumptions of the *June 2018 model*: residual analysis.

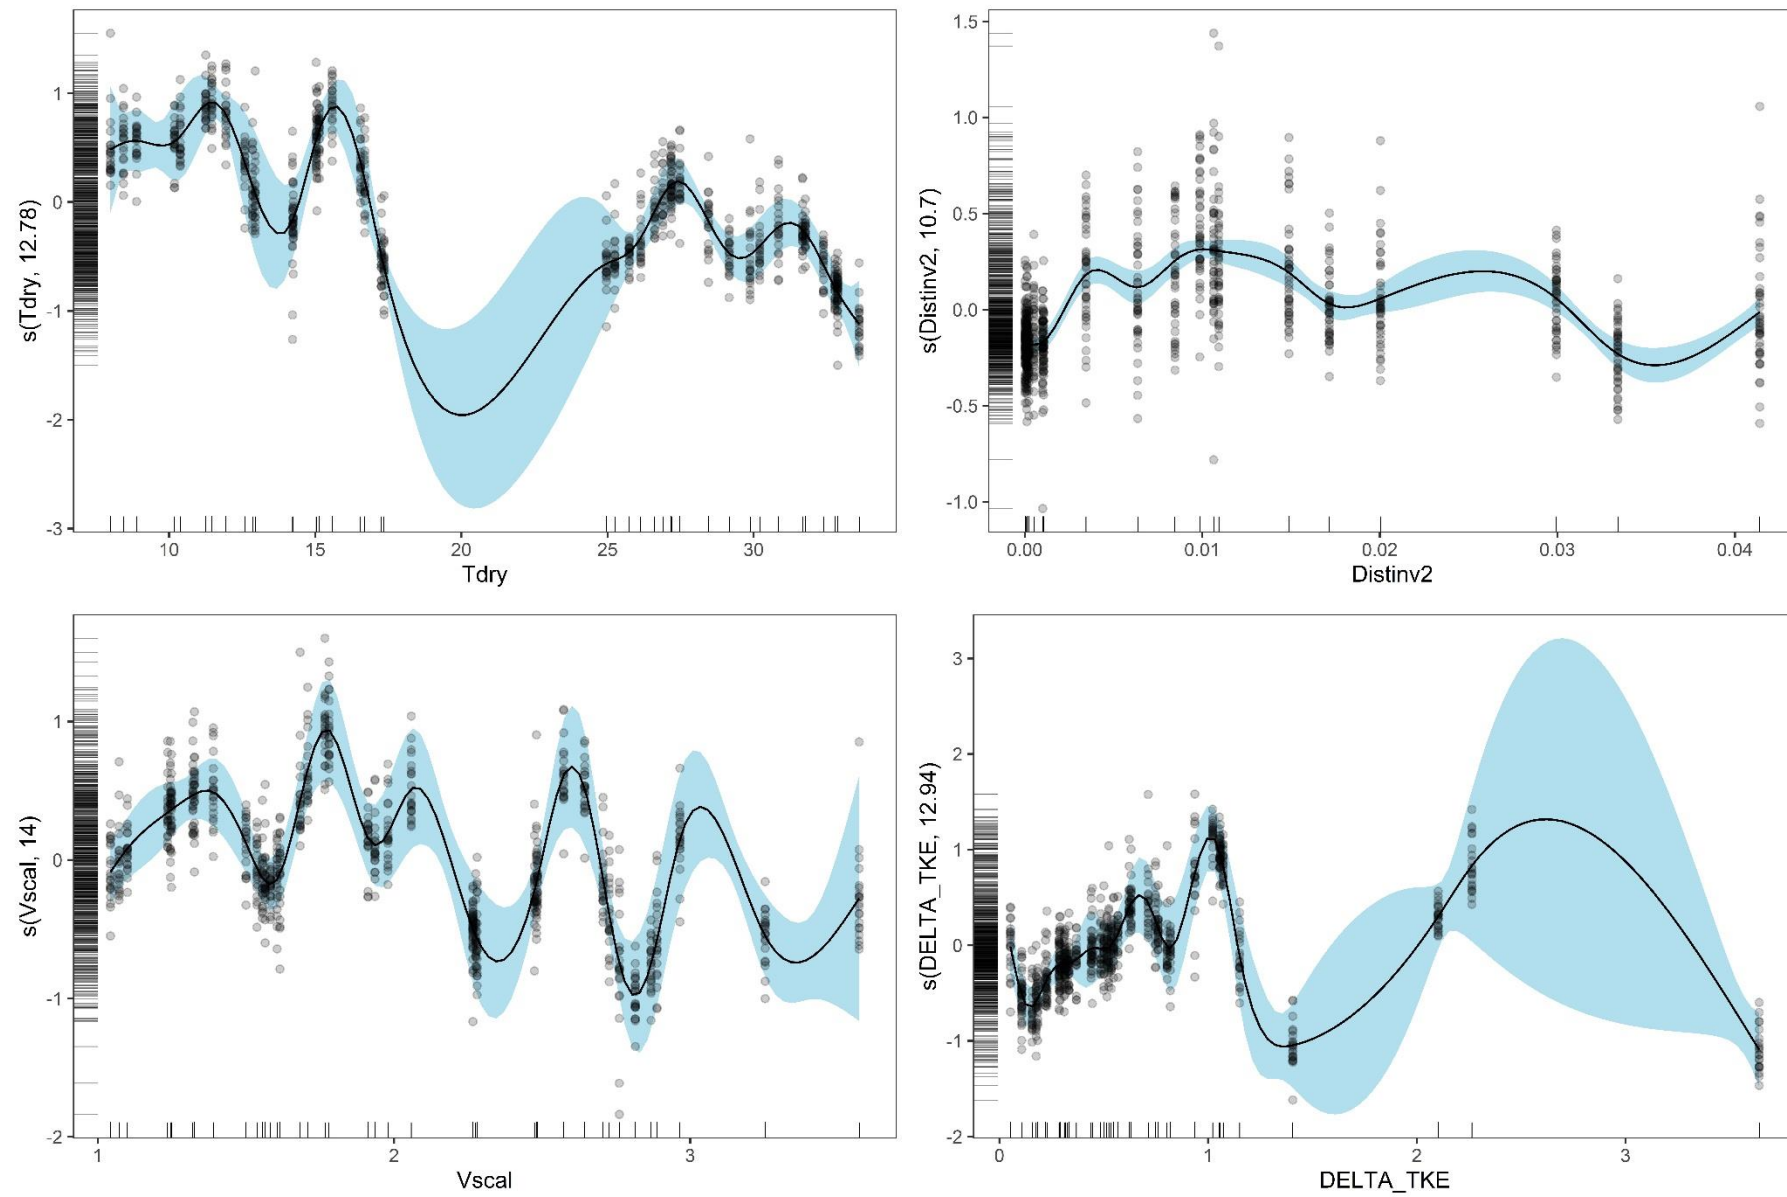

**Figure S14.** Overall model: spline trends for  $T_{dry}$ ,  $Distinv2$ ,  $Vscal$  and  $DELTA\_TKE$ .

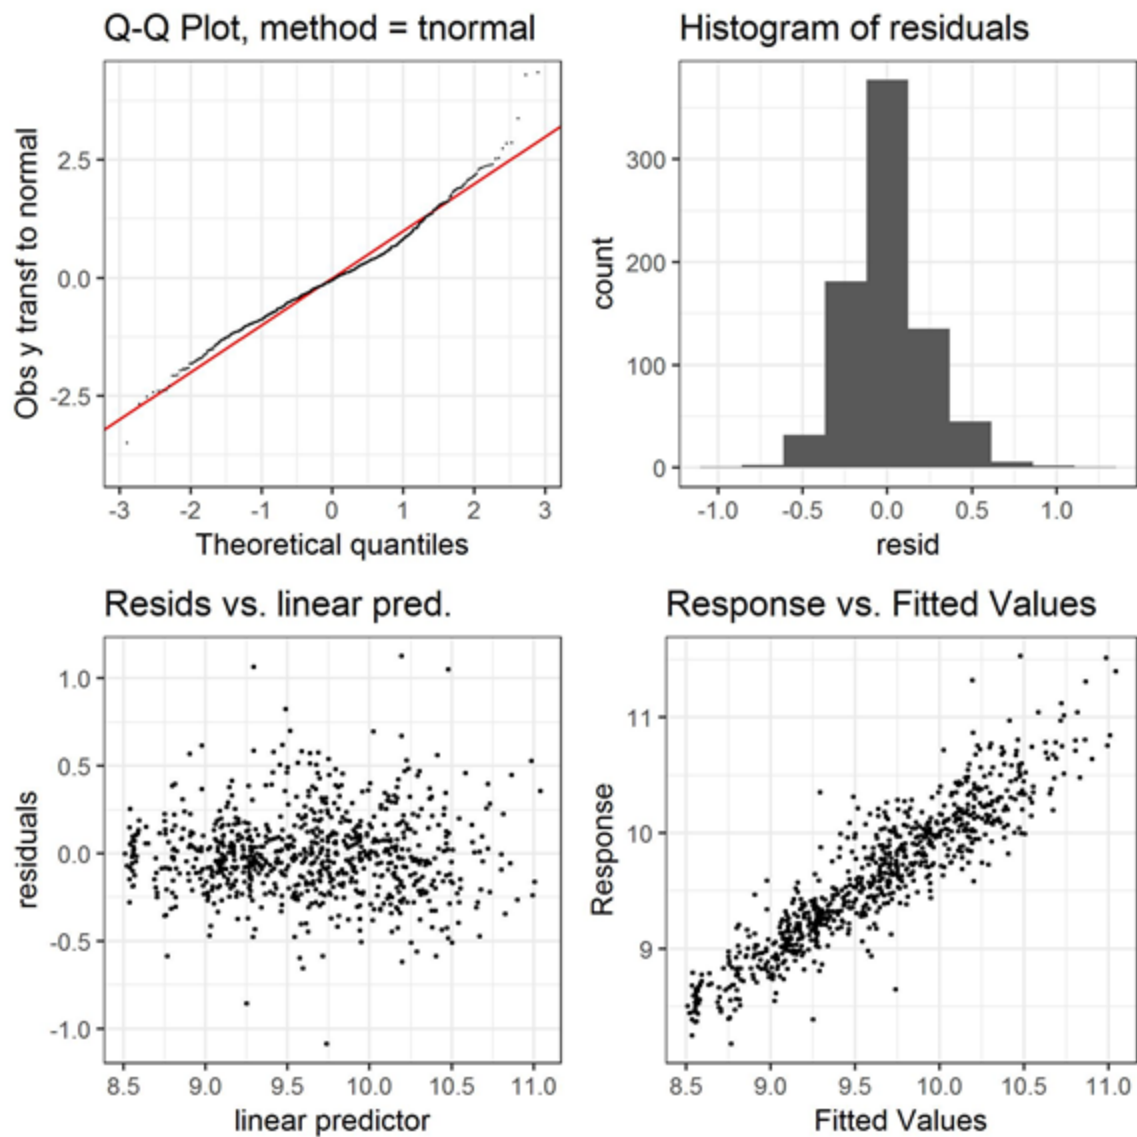

**Figure S15.** Check of the basic assumptions of the *overall model*: residual analysis.
